# Supplementary material for: Prevalent pH Controls the Capacity of Galdieria maxima to Use Ammonia and Nitrate as a Nitrogen Source
Source: MDPI journal article supplement (doi:10.3390/plants9020232), 2020-02-11
Supplement: s1 [file s1]

| Ammonium     |     |                |                |                  |                  |
|--------------|-----|----------------|----------------|------------------|------------------|
| Start pH 7   |     | Time 0         | Day 4          | Day 8            | Day 12           |
| ACUF551      | OD  | 0.259 ± 0.006  | 0.318 ± 0.007  | 0.275 ± 0.028    | 0.234 ± 0.029    |
|              | Chl | 15.123 ± 1.969 | 14.940 ± 1.839 | 6.770 ± 1.900    | 6.087 ± 1.132    |
|              | pH  | 6.9 ± 0.05     | 7.0 ± 0.02     | 7.0 ± 0.04       | 6.9 ± 0.03       |
|              |     |                |                |                  |                  |
| ACUF722      | OD  | 0.271 ± 0.013  | 0.289 ± 0.018  | 0.283 ± 0.059    | 0.288 ± 0.016    |
|              | Chl | 30.867 ± 1.273 | 15.333 ± 3.055 | 7.370 ± 1.735    | 6.680 ± 0.10     |
|              | pH  | 7.00 ± 0.01    | 7.1 ± 0.04     | 6.9 ± 0.06       | 6.7 ± 0.02       |
|              |     |                |                |                  |                  |
| IPPAS P507   | OD  | 0.225 ± 0.007  | 0.240 ± 0.006  | 0.232 ± 0.059    | 0.255 ± 0.072    |
|              | Chl | 32.190 ± 0.375 | 6.700 ± 1.873  | 4.149 ± 0.411    | 2.877 ± 1.051    |
|              | pH  | 7.0 ± 0.05     | 7.0 ± 0.03     | 7.04 ± 0.04      | 7.0 ± 0.01       |
|              |     |                |                |                  |                  |
| Start pH 6.5 |     | Time 0         | Day 4          | Day 8            | Day 12           |
| ACUF551      | OD  | 0.319 ± 0.004  | 0.726 ± 0.008  | 1.171 ± 0.008    | 2.883 ± 0.272    |
|              | Chl | 29.233 ± 0.493 | 52.167 ± 0.907 | 72.033 ± 1.050   | 100.033 ± 0.208  |
|              | pH  | 6.4 ± 0.00     | 5.9 ± 0.058    | 3.7 ± 0.06       | 3.0 ± 0.06       |
|              |     |                |                |                  |                  |
| ACUF722      | OD  | 0.338 ± 0.001  | 0.487 ± 0.007  | 0.533 ± 0.007    | 0.960 ± 0.025    |
|              | Chl | 29.233 ± 0.493 | 43.433 ± 0.666 | 73.320 ± 2.282   | 100.033 ± 0.208  |
|              | pH  | 6.5 ± 0.06     | 6.2 ± 0.02     | 4.3 ± 0.01       | 3.9 ± 0.06       |
|              |     |                |                |                  |                  |
| IPPAS P507   | OD  | 0.314 ± 0.004  | 0.300 ± 0.004  | 0.298 ± 0.003    | 0.279 ± 0.015    |
|              | Chl | 29.867 ± 0.058 | 29.100 ± 0.100 | 28.500 ± 0.781   | 27.200 ± 0.721   |
|              | pH  | 6.50 ± 0.06    | 6.4 ± 0.01     | 6.3 ± 0.01       | 6.0 ± 0.01       |
|              |     |                |                |                  |                  |
| Start pH 5   |     | Time 0         | Day 4          | Day 8            | Day 12           |
| ACUF551      | OD  | 0.373 ± 0.20   | 1.233 ± 0.058  | 2.437 ± 0.259    | 3.080 ± 0.035    |
|              | Chl | 21.967 ± 0.636 | 31.300 ± 2.941 | 199.333 ± 19.655 | 293.333 ± 11.547 |
|              | pH  | 4.9 ± 0.14     | 3.2 ± 0.02     | 2.7 ± 0.03       | 2.7 ± 0.04       |
|              |     |                |                |                  |                  |
| ACUF722      | OD  | 0.289 ± 0.023  | 0.484 ± 0.020  | 0.756 ± 0.026    | 1.433 ± 0.104    |
|              | Chl | 26.930 ± 0.324 | 31.313 ± 1.242 | 40.763 ± 5.033   | 59.620 ± 1.000   |
|              | pH  | 5.2 ± 0.09     | 3.9 ± 0.03     | 3.3 ± 0.01       | 2.9 ± 0.02       |

|            |     |                    |                    |                    |                      |
|------------|-----|--------------------|--------------------|--------------------|----------------------|
|            | OD  | $0.324 \pm 0.010$  | $0.590 \pm 0.025$  | $1.110 \pm 0.108$  | $3.147 \pm 0.184$    |
| IPPAS P507 | Chl | $25.330 \pm 0.754$ | $31.900 \pm 4.046$ | $52.350 \pm 6.800$ | $227.333 \pm 23.029$ |
|            | pH  | $4.9 \pm 0.05$     | $2.8 \pm 0.11$     | $2.6 \pm 0.14$     | $2.4 \pm 0.09$       |

| Start pH 1.5 |     | Time 0             | Day 4              | Day 8              | Day 12               |
|--------------|-----|--------------------|--------------------|--------------------|----------------------|
|              | OD  | $0.414 \pm 0.009$  | $0.722 \pm 0.030$  | $1.481 \pm 0.054$  | $3.044 \pm 0.128$    |
| ACUF551      | Chl | $23.447 \pm 0.035$ | $37.370 \pm 1.768$ | $70.927 \pm 3.677$ | $137.146 \pm 13.152$ |
|              | pH  | $1.3 \pm 0.05$     | $1.05 \pm 0.02$    | $1.4 \pm 0.06$     | $1.4 \pm 0.03$       |

|         |     |                    |                    |                    |                     |
|---------|-----|--------------------|--------------------|--------------------|---------------------|
|         | OD  | $0.396 \pm 0.014$  | $0.676 \pm 0.004$  | $1.485 \pm 0.037$  | $2.743 \pm 0.197$   |
| ACUF722 | Chl | $24.593 \pm 0.028$ | $46.353 \pm 6.958$ | $72.893 \pm 6.081$ | $124.733 \pm 4.780$ |
|         | pH  | $1.4 \pm 0.04$     | $1.4 \pm 0.02$     | $1.4 \pm 0.02$     | $1.5 \pm 0.01$      |

|            |     |                    |                     |                      |                     |
|------------|-----|--------------------|---------------------|----------------------|---------------------|
|            | OD  | $0.389 \pm 0.009$  | $1.167 \pm 0.029$   | $2.237 \pm 0.076$    | $3.667 \pm 0.153$   |
| IPPAS P507 | Chl | $21.700 \pm 0.428$ | $119.333 \pm 4.041$ | $280.917 \pm 17.522$ | $295.333 \pm 7.024$ |
|            | pH  | $1.1 \pm 0.05$     | $1.4 \pm 0.02$      | $1.5 \pm 0.08$       | $1.1 \pm 0.12$      |

| Nitrate    |     |                   |                   |                   |                   |
|------------|-----|-------------------|-------------------|-------------------|-------------------|
| Start pH 7 |     | Time 0            | Day 4             | Day 8             | Day 12            |
|            | OD  | $0.284 \pm 0.008$ | $0.281 \pm 0.019$ | $0.308 \pm 0.028$ | $0.288 \pm 0.003$ |
| ACUF551    | Chl | $9.534 \pm 0.048$ | $6.603 \pm 0.068$ | $7.880 \pm 0.455$ | $7.407 \pm 0.251$ |
|            | pH  | $7.0 \pm 0.02$    | $6.8 \pm 0.01$    | $7.0 \pm 0.02$    | $7.0 \pm 0.01$    |

|         |     |                    |                    |                    |                   |
|---------|-----|--------------------|--------------------|--------------------|-------------------|
|         | OD  | $0.272 \pm 0.008$  | $0.274 \pm 0.006$  | $0.300 \pm 0.005$  | $0.243 \pm 0.024$ |
| ACUF722 | Chl | $14.643 \pm 0.224$ | $10.467 \pm 0.301$ | $13.333 \pm 0.577$ | $8.967 \pm 2.442$ |
|         | pH  | $7.0 \pm 0.01$     | $6.8 \pm 0.04$     | $7.0 \pm 0.01$     | $7.0 \pm 0.01$    |

|            |     |                    |                   |                   |                   |
|------------|-----|--------------------|-------------------|-------------------|-------------------|
|            | OD  | $0.271 \pm 0.011$  | $0.226 \pm 0.019$ | $0.265 \pm 0.038$ | $0.259 \pm 0.029$ |
| IPPAS P507 | Chl | $22.803 \pm 0.267$ | $7.453 \pm 0.597$ | $3.267 \pm 0.011$ | $0.119 \pm 0.009$ |
|            | pH  | $7.01 \pm 0.03$    | $7.0 \pm 0.04$    | $7.0 \pm 0.03$    | $7.0 \pm 0.03$    |

| Start pH 6.5 |     | Time 0             | Day 4              | Day 8              | Day 12             |
|--------------|-----|--------------------|--------------------|--------------------|--------------------|
|              | OD  | $0.307 \pm 0.004$  | $0.312 \pm 0.004$  | $0.336 \pm 0.004$  | $0.330 \pm 0.001$  |
| ACUF551      | Chl | $22.067 \pm 0.115$ | $22.467 \pm 0.058$ | $22.367 \pm 0.252$ | $22.200 \pm 0.755$ |

|                     |     |                    |                    |                    |                      |
|---------------------|-----|--------------------|--------------------|--------------------|----------------------|
|                     | pH  | $6.5 \pm 0.01$     | $6.5 \pm 0.01$     | $6.5 \pm 0.01$     | $6.5 \pm 0.01$       |
|                     | OD  | $0.315 \pm 0.001$  | $0.326 \pm 0.005$  | $0.313 \pm 0.003$  | $0.329 \pm 0.004$    |
| ACUF722             | Chl | $22.467 \pm 0.058$ | $22.067 \pm 0.058$ | $22.667 \pm 0.058$ | $21.967 \pm 0.058$   |
|                     | pH  | $6.5 \pm 0.01$     | $6.5 \pm 0.01$     | $6.5 \pm 0.01$     | $6.5 \pm 0.01$       |
|                     | OD  | $0.314 \pm 0.004$  | $0.300 \pm 0.004$  | $0.298 \pm 0.003$  | $0.279 \pm 0.015$    |
| IPPAS P507          | Chl | $0.334 \pm 0.004$  | $0.353 \pm 0.005$  | $0.353 \pm 0.001$  | $0.329 \pm 0.003$    |
|                     | pH  | $6.50 \pm 0.01$    | $6.5 \pm 0.01$     | $6.5 \pm 0.01$     | $6.5 \pm 0.00$       |
| <b>Start pH 5</b>   |     | <b>Time 0</b>      | <b>Day 4</b>       | <b>Day 8</b>       | <b>Day 12</b>        |
|                     | OD  | $0.250 \pm 0.021$  | $0.521 \pm 0.020$  | $1.123 \pm 0.025$  | $1.767 \pm 0.153$    |
| ACUF551             | Chl | $14.953 \pm 0.793$ | $16.313 \pm 0.397$ | $23.439 \pm 1.607$ | $46.038 \pm 1.299$   |
|                     | pH  | $5.0 \pm 0.07$     | $5.7 \pm 0.03$     | $6.2 \pm 0.05$     | $6.4 \pm 0.05$       |
|                     | OD  | $0.269 \pm 0.008$  | $0.405 \pm 0.024$  | $0.807 \pm 0.144$  | $1.181 \pm 0.192$    |
| ACUF722             | Chl | $18.577 \pm 0.106$ | $19.887 \pm 0.698$ | $38.640 \pm 2.359$ | $46.038 \pm 1.299$   |
|                     | pH  | $5.3 \pm 0.02$     | $5.7 \pm 0.02$     | $6.4 \pm 0.05$     | $6.6 \pm 0.06$       |
|                     | OD  | $0.353 \pm 0.013$  | $0.444 \pm 0.020$  | $0.790 \pm 0.085$  | $1.123 \pm 0.068$    |
| IPPAS P507          | Chl | $27.747 \pm 0.525$ | $22.783 \pm 1.788$ | $27.967 \pm 1.124$ | $51.333 \pm 1.155$   |
|                     | pH  | $5.1 \pm 0.05$     | $5.5 \pm 0.09$     | $6.1 \pm 0.05$     | $6.3 \pm 0.06$       |
| <b>Start pH 1.5</b> |     | <b>Time 0</b>      | <b>Day 4</b>       | <b>Day 8</b>       | <b>Day 12</b>        |
|                     | OD  | $0.348 \pm 0.021$  | $0.663 \pm 0.30$   | $1.509 \pm 0.145$  | $2.525 \pm 0.464$    |
| ACUF551             | Chl | $12.667 \pm 0.015$ | $13.009 \pm 0.429$ | $47.153 \pm 7.902$ | $108.167 \pm 1.060$  |
|                     | pH  | $1.5 \pm 0.00$     | $1.4 \pm 0.00$     | $1.4 \pm 0.01$     | $1.5 \pm 0.00$       |
|                     | OD  | $0.388 \pm 0.008$  | $0.920 \pm 0.012$  | $1.296 \pm 0.085$  | $2.722 \pm 0.298$    |
| ACUF722             | Chl | $23.730 \pm 0.352$ | $39.047 \pm 1.001$ | $59.533 \pm 0.170$ | $108.167 \pm 1.060$  |
|                     | pH  | $1.5 \pm 0.03$     | $1.4 \pm 0.03$     | $1.4 \pm 0.01$     | $1.4 \pm 0.04$       |
|                     | OD  | $0.389 \pm 0.009$  | $0.829 \pm 0.019$  | $1.270 \pm 0.073$  | $2.596 \pm 0.222$    |
| IPPAS P507          | Chl | $21.700 \pm 0.428$ | $43.627 \pm 4.816$ | $50.053 \pm 1.616$ | $204.067 \pm 31.126$ |
|                     | pH  | $1.1 \pm 0.05$     | $1.8 \pm 0.05$     | $1.4 \pm 0.06$     | $1.2 \pm 0.02$       |
